# Supplementary material
Source: PubMed Central journal article supplement (PMC9909572)

## Supplemental Online Content

Jia X, Al Rifai M, Hoogeveen R, et al. Association of long-term change in N-terminal pro–B-type natriuretic peptide with incident heart failure and death. *JAMA Cardiol*. Published online February 8, 2023. doi:10.1001/jamacardio.2022.5309

**eFigure 1.** Inclusion and exclusion criteria

**eFigure 2.** Kaplan-Meier curves of heart failure hospitalization (a) and all-cause death (b) by NT-proBNP change categories

**eTable 1.** Stratified analysis by visit 2 NT-proBNP levels of the association between percent change in NT-proBNP (continuous variable) with risk of incident heart failure hospitalization and all-cause death after visit 4

**eTable 2.** Subgroup analysis of association between percent change in NT-proBNP and heart failure hospitalization

**eTable 3.** Subgroup analysis of association between percent change in NT-proBNP and all-cause death. Significant p-interaction is <0.007 after accounting for multiple

**eTable 4.** Stratified analysis by visit 2 NT-proBNP levels of the association between percent change in NT-proBNP, modeled as a categorical variable, with risk for incident heart failure hospitalization and all-cause death after visit 4

**eTable 5.** Association between risk factors at visit 2 with absolute change in NT-proBNP

This supplemental material has been provided by the authors to give readers additional information about their work.

**eTable 1.** Stratified analysis by visit 2 NT-proBNP levels of the association between percent change in NT-proBNP (continuous variable) with risk of incident heart failure hospitalization and all-cause death after visit 4.

|                 | Visit 2 NT-proBNP <125pg/mL | Visit 2 NT-proBNP ≥125pg/mL | P <sub>interaction</sub> |
|-----------------|-----------------------------|-----------------------------|--------------------------|
| Heart Failure   |                             |                             | 0.096                    |
| Model 1         | 1.10 (1.07, 1.13)           | 1.16 (1.09, 1.24)           |                          |
| Model 2         | 1.06 (1.02, 1.11)           | 1.10 (0.98, 1.23)           |                          |
| Model 3         | 1.12 (1.08, 1.16)           | 1.05 (0.95, 1.16)           |                          |
| Model 4         | 1.00 (0.95, 1.05)           | 0.77 (0.56, 1.07)           |                          |
| All-Cause Death |                             |                             | 0.791                    |
| Model 1         | 1.08 (1.05, 1.10)           | 1.08 (1.05, 1.11)           |                          |
| Model 2         | 1.05 (1.02, 1.09)           | 1.05 (1.01, 1.09)           |                          |
| Model 3         | 1.07 (1.04, 1.11)           | 1.06 (1.02, 1.10)           |                          |
| Model 4         | 1.02 (0.98, 1.06)           | 0.96 (0.91, 1.02)           |                          |

Model 1: age, sex, race

Model 2: model 1 plus systolic blood pressure, diastolic blood pressure, hypertensive medication use, diabetes, fasting glucose, low-density lipoprotein cholesterol, triglyceride, cholesterol lowering medication use, cigarette smoking, estimated glomerular filtration rate, body mass index, prevalent coronary heart disease.

Model 3: model 2 plus visit 2 NT-proBNP (log-transformed)

Model 4: model 2 plus visit 4 NT-proBNP (log-transformed)

**eTable 2.** Subgroup analysis of association between percent change in NT-proBNP and heart failure hospitalization.

| Subgroups                 | HR (95% CI)      | p-interaction |
|---------------------------|------------------|---------------|
|                           |                  | 0.11          |
| Female                    | 1.12 (1.04,1.21) |               |
| Male                      | 1.04 (0.99,1.09) |               |
|                           |                  | 0.96          |
| White                     | 1.06 (1.01,1.10) |               |
| Black                     | 1.05 (0.94,1.17) |               |
|                           |                  | 0.15          |
| Non-hypertensive          | 1.03 (0.96,1.11) |               |
| Hypertensive              | 1.10 (1.04,1.16) |               |
|                           |                  | 0.04          |
| Non-diabetic              | 1.05 (1.00,1.10) |               |
| Diabetic                  | 1.15 (1.01,1.32_ |               |
|                           |                  | 0.45          |
| BMI <30 kg/m <sup>2</sup> | 1.06 (1.01,1.07) |               |
| BMI ≥30 kg/m <sup>2</sup> | 1.10 (1.00,1.21) |               |
|                           |                  | 0.046         |
| Not current smoking       | 1.04 (0.99,1.09) |               |
| Current smoking           | 1.16 (1.06,1.28) |               |
|                           |                  | 0.14          |
| No prevalent CHD          | 1.10 (1.04,1.17) |               |
| Prevalent CHD             | 1.03 (0.97,1.10) |               |

*Abbreviations:* BMI = body mass index, CHD = coronary heart disease

Model is adjusted for age, sex, race, systolic blood pressure, diastolic blood pressure, hypertensive medication use, diabetes, fasting glucose, low-density lipoprotein cholesterol, triglyceride, cholesterol lowering medication use, cigarette smoking, estimated glomerular filtration rate, body mass index, prevalent coronary heart disease.

**eTable 3.** Subgroup analysis of association between percent change in NT-proBNP and all-cause death. Significant p-interaction is <0.007 after accounting for multiple

| Subgroups                 | HR (95% CI)          | p-interaction |
|---------------------------|----------------------|---------------|
|                           |                      | 0.02          |
| Female                    | 1.13 (1.07,1.20)     |               |
| Male                      | 1.04 (1.00,1.07)     |               |
|                           |                      | 0.10          |
| White                     | 1.05 (1.02,1.08)     |               |
| Black                     | 1.09 (1.02,1.17)0.58 |               |
|                           |                      | 0.17          |
| Non-hypertensive          | 1.04 (1.00,1.08)     |               |
| Hypertensive              | 1.08 (1.03,1.13)     |               |
|                           |                      | 0.73          |
| Non-diabetic              | 1.05 (1.02,1.09)     |               |
| Diabetic                  | 1.05 (1.01,1.09)     |               |
|                           |                      | 0.054         |
| BMI <30 kg/m <sup>2</sup> | 1.04 (1.01,1.08)     |               |
| BMI ≥30 kg/m <sup>2</sup> | 1.12 (1.05,1.19)     |               |
|                           |                      | 0.91          |
| Not current smoking       | 1.05 (1.03,1.08)     |               |
| Current smoking           | 1.06 (0.96,1.16)     |               |
|                           |                      | 0.02          |
| No prevalent CHD          | 1.10 (1.06,1.15)     |               |
| Prevalent CHD             | 1.03 (0.99,1.07)     |               |

*Abbreviations:* BMI = body mass index, CHD = coronary heart disease

Model is adjusted for age, sex, race, systolic blood pressure, diastolic blood pressure, hypertensive medication use, diabetes, fasting glucose, low-density lipoprotein cholesterol, triglyceride, cholesterol lowering medication use, cigarette smoking, estimated glomerular filtration rate, body mass index, prevalent coronary heart disease.

**eTable 4.** Stratified analysis by visit 2 NT-proBNP levels of the association between percent change in NT-proBNP, modeled as a categorical variable, with risk for incident heart failure hospitalization and all-cause death after visit 4.

|                               | Visit 2 NT-proBNP <125pg/mL |              |                   | Visit 2 NT-proBNP ≥125pg/mL |              |                    |
|-------------------------------|-----------------------------|--------------|-------------------|-----------------------------|--------------|--------------------|
|                               | >25% decrease               | ≤ 25% change | >25% increase     | >25% decrease               | ≤ 25% change | >25% increase      |
| Heart Failure Hospitalization |                             |              |                   |                             |              |                    |
| Model 1                       | 1.08 (0.88, 1.32)           | Ref          | 2.61 (2.11, 3.22) | 1.17 (0.89, 1.53)           | Ref          | 6.13 (3.15, 11.96) |
| Model 2                       | 1.15 (0.86, 1.53)           | Ref          | 1.93 (1.39, 2.67) | 0.86 (0.57, 1.29)           | Ref          | 6.56 (2.27, 18.99) |
| Model 3                       | 1.02 (0.76, 1.37)           | Ref          | 4.30 (2.82, 6.55) | 0.81 (0.53, 1.22)           | Ref          | 7.46 (2.53, 21.97) |
| Model 4                       | 1.37 (1.02, 1.84)           | Ref          | 1.26 (0.86, 1.84) | 1.32 (0.32, 5.50)           | Ref          | 1.30 (0.82, 2.06)  |
| All-Cause Death               |                             |              |                   |                             |              |                    |
| Model 1                       | 1.02 (0.89, 1.17)           | Ref          | 1.82 (1.56, 2.11) | 0.97 (0.80, 1.18)           | Ref          | 8.02 (5.16, 12.47) |
| Model 2                       | 1.14 (0.94, 1.38)           | Ref          | 1.56 (1.26, 1.94) | 0.59 (0.44, 0.79)           | Ref          | 5.47 (2.58, 11.60) |
| Model 3                       | 1.10 (0.90, 1.33)           | Ref          | 2.06 (1.55, 2.72) | 0.55 (0.41, 0.74)           | Ref          | 5.60 (2.63, 11.93) |
| Model 4                       | 1.21 (0.99, 1.47)           | Ref          | 1.32 (1.03, 1.69) | 0.80 (0.58, 1.11)           | Ref          | 1.22 (0.41, 3.69)  |

Model 1: age, sex, race

Model 2: model 1 plus systolic blood pressure, diastolic blood pressure, hypertensive medication use, diabetes, fasting glucose, low-density lipoprotein cholesterol, triglyceride, cholesterol lowering medication use, cigarette smoking, estimated glomerular filtration rate, body mass index, prevalent coronary heart disease.

**eTable 5.** Association between risk factors at visit 2 with absolute change in NT-proBNP.

|                                  | $\beta$ -coefficient | 95% Confidence Interval | p-value |
|----------------------------------|----------------------|-------------------------|---------|
| Age                              | 0.025                | 0.018 – 0.031           | <0.001  |
| Male                             | -0.308               | -0.372 – -0.245         | <0.001  |
| Black Race                       | -0.298               | -0.383 – -0.213         | <0.001  |
| Systolic Blood Pressure          | 0.011                | 0.008 – 0.014           | <0.001  |
| Diastolic Blood Pressure         | -0.005               | -0.009 – -0.000         | 0.044   |
| Hypertension Medication Use      | 0.278                | 0.198 – 0.358           | <0.001  |
| Diabetes                         | 0.056                | -0.073 – 0.185          | 0.393   |
| LDL-C                            | -0.001               | -0.001 – 0.000          | 0.155   |
| Triglyceride                     | -0.003               | -0.004 – -0.002         | <0.001  |
| Cholesterol medication           | -0.054               | -0.183 – 0.076          | 0.414   |
| eGFR                             | -0.012               | -0.014 – -0.010         | <0.001  |
| Body Mass Index                  | -0.010               | -0.017 – -0.003         | 0.004   |
| Current Smoker                   | 0.223                | 0.144 – 0.857           | <0.001  |
| Prevalent Coronary Heart Disease | 2.663                | 2.065-3.260             | <0.001  |

*Abbreviations:* LDL-C = low-density lipoprotein cholesterol, eGFR = estimated glomerular filtration rate.

**eFigure 1.** Inclusion and exclusion criteria.

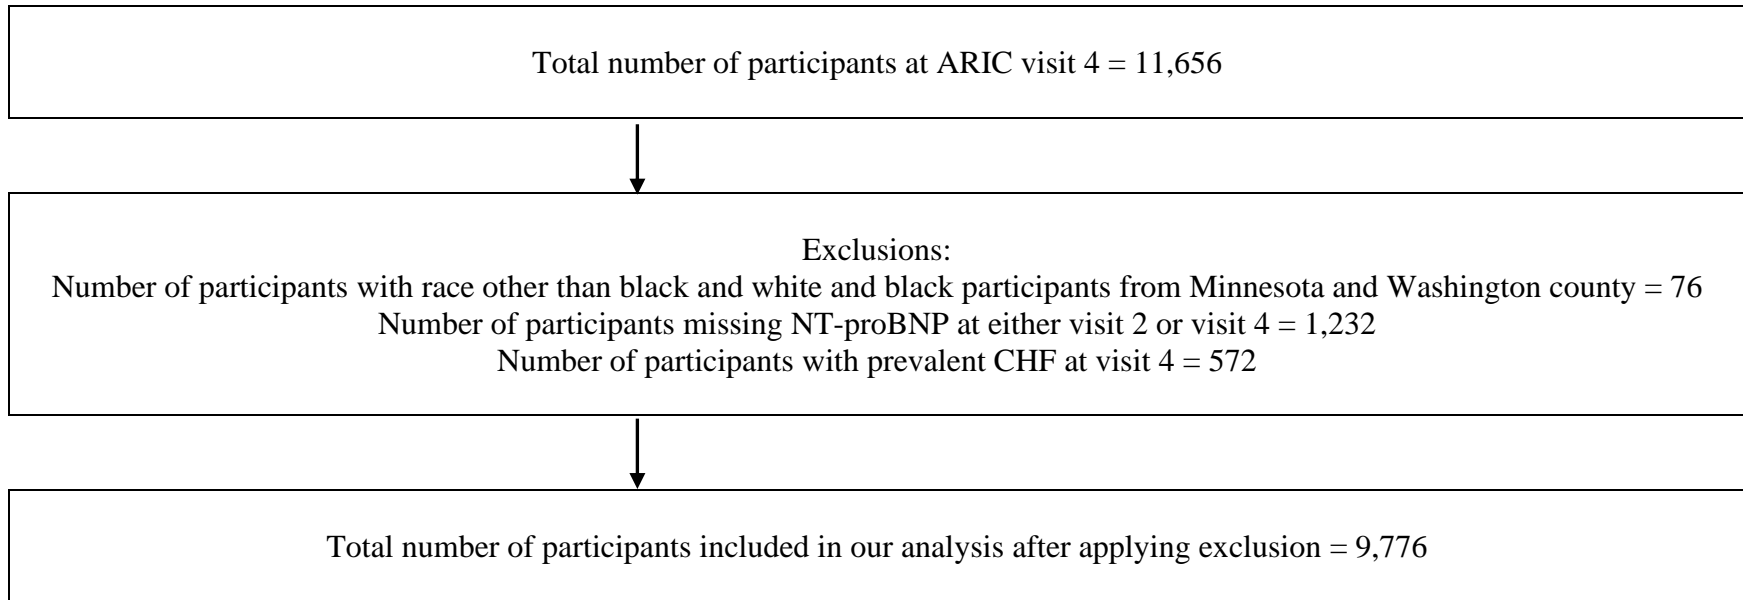

**eFigure 2.** Kaplan-Meier curves of heart failure hospitalization (a) and all-cause death (b) by NT-proBNP change categories.

a)

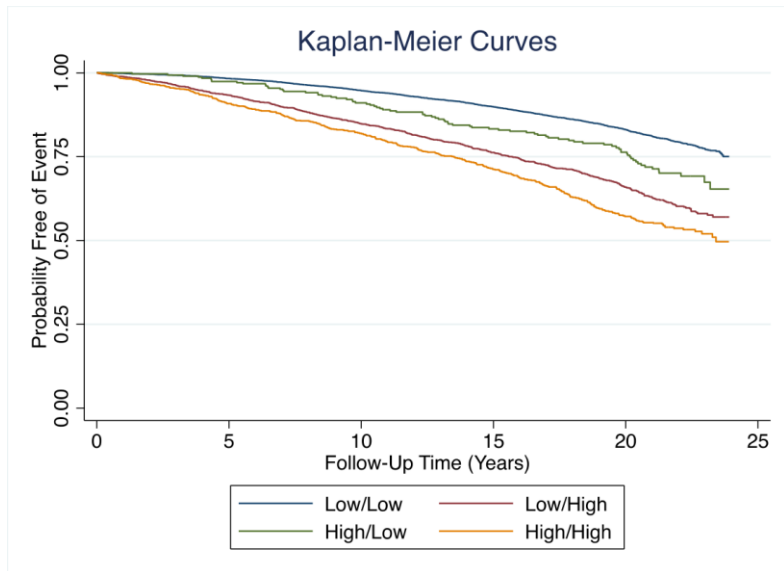

b)

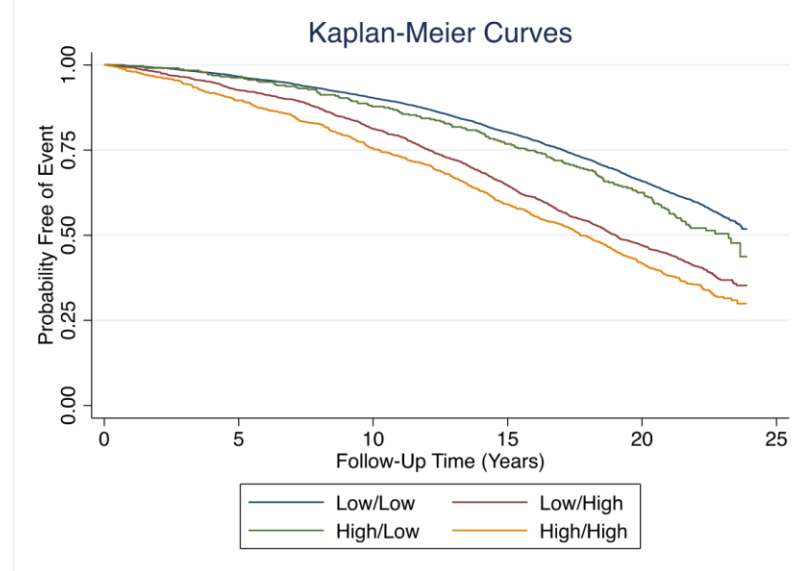

Supplement: jamacardiol-e225309-s001.pdf [file jamacardiol-e225309-s001.pdf]
