# Supplementary material
Source: PubMed Central journal article supplement (PMC9909572)
Supplement: jamacardiol-e225309-s002.pdf [file jamacardiol-e225309-s002.pdf]

## Data Sharing Statement

Jia. Association of Long-term Change in N-Terminal Pro-B-Type Natriuretic Peptide With Incident Heart Failure and Death. *JAMA Cardiol.* Published February 08, 2023.  
doi:10.1001/jamacardio.2022.5309

### Data

**Data available:** No

### Additional Information

**Explanation for why data not available:** The ARIC study is a NIH sponsored study and data is available for those who request the same; however a formal application for the same will need to be made
